# Supplementary material for: Early Life Antimicrobial Exposure: Impact on Clostridioides difficile Colonization in Infants
Source: MDPI journal article supplement (doi:10.3390/antibiotics11070981), 2022-07-21
Supplement: s1 [file s1]

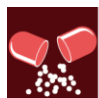

## Supplementary File

**Table S1.** Distribution (%) of antibiotic exposure, household cleaning products use and selected covariates at 3–4 months, 12 months and both time points; compared to the entire CHILD cohort at 3 sites (Edmonton, Winnipeg, Vancouver).

| Column percentages                     | 3–4 Month Sample<br>%<br>n=1,429 | 12 Month Sample<br>%<br>n=1,728 | Persistent Sample**<br>%<br>n=653 | CHILD Cohort at 3<br>Sites %<br>n=2,150 |
|----------------------------------------|----------------------------------|---------------------------------|-----------------------------------|-----------------------------------------|
| <b>Any antibiotics*</b>                |                                  |                                 |                                   |                                         |
| No                                     | 51                               | 50                              | 52                                | 50                                      |
| Yes                                    | 49                               | 50                              | 48                                | 50                                      |
| <b>Household cleaning products use</b> |                                  |                                 |                                   |                                         |
| Lower (below average)                  | 53                               | 54                              | 54                                | 53                                      |
| Higher (above average)                 | 47                               | 46                              | 46                                | 47                                      |
| <b>Birth method</b>                    |                                  |                                 |                                   |                                         |
| Vaginal                                | 78                               | 75                              | 77                                | 76                                      |
| Caesarean                              | 22                               | 25                              | 23                                | 24                                      |
| <b>Breastfeeding</b>                   |                                  |                                 |                                   |                                         |
| No                                     | 18                               | 14                              | 16                                | 15                                      |
| Yes                                    | 82                               | 86                              | 84                                | 85                                      |
| <b>Infant sex</b>                      |                                  |                                 |                                   |                                         |
| Male                                   | 54                               | 52                              | 56                                | 52                                      |
| Female                                 | 46                               | 48                              | 44                                | 48                                      |
| <b>Smoke exposure</b>                  |                                  |                                 |                                   |                                         |
| No                                     | 82                               | 83                              | 83                                | 82                                      |
| Yes                                    | 18                               | 17                              | 16                                | 18                                      |

Notes: \*Any antibiotics: Exposure to maternal intrapartum antibiotic or direct infant antibiotic by 3 Months. \*\*Persistent sample: Subset of infants used to identify *C. difficile* colonization at both 3–4 months and 12 months (persistent colonization).

**Table S2.** Sensitivity analysis for antimicrobial exposure and *C. difficile* colonization at 12 months of age.

| Antimicrobial Exposure*<br>(ref=NALC) | Adjusted OR†<br>(95% CI) | p value | Adjusted OR‡<br>(95% CI) | p value |
|---------------------------------------|--------------------------|---------|--------------------------|---------|
| AALC                                  | 1.35<br>(1.00-1.83)      | 0.043   | 1.41<br>(1.02-1.94)      | 0.034   |
| NAHC                                  | 1.12<br>(0.84-1.49)      | 0.438   | 1.06<br>(0.78-1.44)      | 0.694   |
| AAHC                                  | 1.35<br>(0.99-1.85)      | 0.057   | 1.33<br>(0.95-1.88)      | 0.095   |

Notes: \*Antimicrobial exposure by 3 months (NALC: no antibiotics and lower usage of cleaning products, AALC: any antibiotics and lower usage of cleaning products, NAHC: no antibiotics and higher usage of cleaning products, AAHC: any antibiotics and higher usage of cleaning products); †Adjusted for antibiotics after 3 months and variables in final model, ‡ Excluding any infant that

received antibiotics after 3 months and adjusted for variables in final model; OR: odds ratio; CI: confidence interval; statistically significant *p*-values displayed in **bold**.

**Table S3.** Population characteristics and *C. difficile* colonization at 3–4 months and 12 months.

| Row percentages                  | <i>C. difficile</i> Colonization at 3–4 Months<br>Total <i>n</i> =1429 |                                          |                                          | <i>C. difficile</i> Colonization at 12 Months<br>Total <i>n</i> =1728 |                                          |                                          |
|----------------------------------|------------------------------------------------------------------------|------------------------------------------|------------------------------------------|-----------------------------------------------------------------------|------------------------------------------|------------------------------------------|
|                                  | Total <sup>a</sup>                                                     | <i>C. difficile</i><br>Yes, <i>n</i> (%) | <i>p</i> value<br>(X <sup>2</sup> exact) | Total <sup>a</sup>                                                    | <i>C. difficile</i><br>Yes, <i>n</i> (%) | <i>p</i> value<br>(X <sup>2</sup> exact) |
| <b>Antimicrobial exposure*</b>   |                                                                        |                                          |                                          |                                                                       |                                          |                                          |
| NALC                             | 406                                                                    | 97 (24%)                                 | <b>&lt;0.001</b>                         | 488                                                                   | 198 (41%)                                | <b>0.009</b>                             |
| AALC                             | 346                                                                    | 105 (30%)                                |                                          | 447                                                                   | 223 (50%)                                |                                          |
| NAHC                             | 318                                                                    | 103 (32%)                                |                                          | 369                                                                   | 164 (44%)                                |                                          |
| AAHC                             | 359                                                                    | 140 (39%)                                |                                          | 424                                                                   | 212 (50%)                                |                                          |
| <b>Maternal age</b>              |                                                                        |                                          |                                          |                                                                       |                                          |                                          |
| 18 – 29                          | 503                                                                    | 195 (39%)                                | <b>&lt;0.001</b>                         | 576                                                                   | 268 (47%)                                | 0.916                                    |
| 30 – 39                          | 874                                                                    | 238 (27%)                                |                                          | 1,094                                                                 | 501 (46%)                                |                                          |
| ≥40                              | 52                                                                     | 12 (23%)                                 |                                          | 58                                                                    | 28 (48%)                                 |                                          |
| <b>Maternal race</b>             |                                                                        |                                          |                                          |                                                                       |                                          |                                          |
| Caucasian                        | 1,072                                                                  | 346 (32%)                                | 0.162                                    | 1315                                                                  | 583 (44%)                                | <b>&lt;0.001</b>                         |
| Asian                            | 203                                                                    | 52 (26%)                                 |                                          | 248                                                                   | 147 (59%)                                |                                          |
| Other                            | 141                                                                    | 42 (30%)                                 |                                          | 156                                                                   | 63 (40%)                                 |                                          |
| <b>Family income</b>             |                                                                        |                                          |                                          |                                                                       |                                          |                                          |
| <50,000                          | 199                                                                    | 71 (36%)                                 | 0.201                                    | 212                                                                   | 85 (40%)                                 | 0.208                                    |
| 50,000 – 99,999                  | 487                                                                    | 158 (32%)                                |                                          | 597                                                                   | 271 (45%)                                |                                          |
| ≥100,000                         | 516                                                                    | 160 (28%)                                |                                          | 730                                                                   | 347 (48%)                                |                                          |
| Prefer not to answer             | 130                                                                    | 39 (30%)                                 |                                          | 147                                                                   | 73 (50%)                                 |                                          |
| <b>Birth method</b>              |                                                                        |                                          |                                          |                                                                       |                                          |                                          |
| Vaginal                          | 1,096                                                                  | 314 (29%)                                | <b>0.002</b>                             | 1297                                                                  | 584 (45%)                                | 0.248                                    |
| CS-elective                      | 134                                                                    | 50 (37%)                                 |                                          | 175                                                                   | 86 (49%)                                 |                                          |
| CS-emergency                     | 194                                                                    | 77 (40%)                                 |                                          | 252                                                                   | 126 (50%)                                |                                          |
| <b>Gestational age</b>           |                                                                        |                                          |                                          |                                                                       |                                          |                                          |
| <39 weeks                        | 372                                                                    | 115 (31%)                                | 1.000                                    | 455                                                                   | 226 (50%)                                | 0.070                                    |
| ≥39 weeks                        | 1,057                                                                  | 326 (31%)                                |                                          | 1,267                                                                 | 566 (45%)                                |                                          |
| <b>Infant Sex</b>                |                                                                        |                                          |                                          |                                                                       |                                          |                                          |
| Male                             | 766                                                                    | 255 (33%)                                | 0.067                                    | 896                                                                   | 378 (42%)                                | <b>0.001</b>                             |
| Female                           | 663                                                                    | 190 (29%)                                |                                          | 832                                                                   | 419 (50%)                                |                                          |
| <b>Breastfeeding at 3 Months</b> |                                                                        |                                          |                                          |                                                                       |                                          |                                          |
| Exclusive                        | 791                                                                    | 182 (23%)                                | <b>&lt;0.001</b>                         | 1072                                                                  | 488 (46%)                                | 0.717                                    |
| Mixed                            | 384                                                                    | 142 (37%)                                |                                          | 420                                                                   | 201 (48%)                                |                                          |
| Formula                          | 251                                                                    | 121 (48%)                                |                                          | 435                                                                   | 108 (46%)                                |                                          |
| <b>Furry pet</b>                 |                                                                        |                                          |                                          |                                                                       |                                          |                                          |
| No                               | 777                                                                    | 217 (28%)                                | <b>0.005</b>                             | 936                                                                   | 443 (47%)                                | 0.244                                    |
| Yes                              | 648                                                                    | 226 (35%)                                |                                          | 787                                                                   | 350 (44%)                                |                                          |
| <b>Older sibling</b>             |                                                                        |                                          |                                          |                                                                       |                                          |                                          |
| No                               | 712                                                                    | 240 (34%)                                | <b>0.034</b>                             | 884                                                                   | 462 (52%)                                | <b>&lt;0.001</b>                         |
| Yes                              | 712                                                                    | 202 (28%)                                |                                          | 839                                                                   | 333 (40%)                                |                                          |
| <b>Smoke exposure</b>            |                                                                        |                                          |                                          |                                                                       |                                          |                                          |
| No                               | 1,160                                                                  | 332 (29%)                                | <b>&lt;0.001</b>                         | 1,422                                                                 | 657 (46%)                                | 0.697                                    |
| Yes                              | 248                                                                    | 103 (42%)                                |                                          | 285                                                                   | 128 (45%)                                |                                          |

Notes: \*Antimicrobial exposure by 3 months (NALC: no antibiotics and lower usage of cleaning products, AALC: any antibiotics and lower usage of cleaning products, NAHC: no antibiotics and higher usage of cleaning products, AAHC: any antibiotics and higher usage of cleaning products);  
 \*Total may not add up due to missing data; *p*-value calculated using Fisher's ( $X^2$ ) exact test and displayed in **bold** when statistically significant.

**Table S4.** Individual adjustment for covariates on antimicrobial exposure and *C. difficile* colonization.

|                                  |                                               | <i>C. difficile</i> Colonization<br>(3–4 months) |                  | <i>C. difficile</i> Colonization<br>(12 months) |                | Persistent <i>C. difficile</i> Colonization |                  |
|----------------------------------|-----------------------------------------------|--------------------------------------------------|------------------|-------------------------------------------------|----------------|---------------------------------------------|------------------|
|                                  |                                               | Odds Ratio<br>(95% CI)                           | <i>p</i> value   | Odds Ratio<br>(95% CI)                          | <i>p</i> value | Odds Ratio<br>(95% CI)                      | <i>p</i> value   |
| <b>CRUDE OR</b>                  |                                               |                                                  |                  |                                                 |                |                                             |                  |
|                                  | <b>Antimicrobial Exposure*<br/>(Ref=NALC)</b> |                                                  |                  |                                                 |                |                                             |                  |
|                                  | AALC                                          | 1.38 (1.00-1.91)                                 | <b>0.047</b>     | 1.45 (1.12-1.88)                                | <b>0.004</b>   | 1.75 (1.06-2.89)                            | <b>0.028</b>     |
|                                  | NAHC                                          | 1.52 (1.10-2.11)                                 | <b>0.011</b>     | 1.17 (0.89-1.54)                                | 0.256          | 1.59 (0.95-2.67)                            | 0.075            |
|                                  | AAHC                                          | 2.03 (1.49-2.78)                                 | <b>&lt;0.001</b> | 1.46 (1.12-1.90)                                | <b>0.004</b>   | 3.20 (1.96-5.23)                            | <b>&lt;0.001</b> |
| <b>ADJUSTED FOR</b>              |                                               |                                                  |                  |                                                 |                |                                             |                  |
| <b>Maternal age</b>              |                                               |                                                  |                  |                                                 |                |                                             |                  |
|                                  | AALC                                          | 1.45 (1.04-2.01)                                 | <b>0.026</b>     | 1.45 (1.12-1.88)                                | <b>0.004</b>   | 1.83 (1.10-3.03)                            | <b>0.019</b>     |
|                                  | NAHC                                          | 1.47 (1.05-2.04)                                 | <b>0.022</b>     | 1.17 (0.89-1.54)                                | 0.256          | 1.60 (0.95-2.69)                            | 0.073            |
|                                  | AAHC                                          | 2.11 (1.54-2.89)                                 | <b>&lt;0.001</b> | 1.46 (1.12-1.90)                                | <b>0.004</b>   | 3.36 (2.05-5.52)                            | <b>&lt;0.001</b> |
| <b>Maternal race</b>             |                                               |                                                  |                  |                                                 |                |                                             |                  |
|                                  | AALC                                          | 1.36 (0.98-1.90)                                 | 0.060            | 1.42 (1.09-1.85)                                | <b>0.008</b>   | 1.78 (1.07-2.95)                            | <b>0.025</b>     |
|                                  | NAHC                                          | 1.47 (1.05-2.05)                                 | <b>0.023</b>     | 1.18 (0.89-1.56)                                | 0.227          | 1.55 (0.92-2.63)                            | 0.099            |
|                                  | AAHC                                          | 1.95 (1.41-2.69)                                 | <b>&lt;0.001</b> | 1.48 (1.13-1.93)                                | <b>0.003</b>   | 3.26 (1.99-5.36)                            | <b>&lt;0.001</b> |
| <b>Birth method</b>              |                                               |                                                  |                  |                                                 |                |                                             |                  |
|                                  | AALC                                          | 1.21 (0.85-1.71)                                 | 0.284            | 1.47 (1.10-1.96)                                | <b>0.008</b>   | 1.57 (0.91-2.69)                            | 0.101            |
|                                  | NAHC                                          | 1.53 (1.10-2.12)                                 | <b>0.011</b>     | 1.17 (0.89-1.54)                                | 0.242          | 1.61 (0.96-2.69)                            | 0.070            |
|                                  | AAHC                                          | 1.67 (1.17-2.40)                                 | <b>0.005</b>     | 1.49 (1.10-2.01)                                | <b>0.008</b>   | 2.76 (1.56-4.87)                            | <b>&lt;0.001</b> |
| <b>Gestational age</b>           |                                               |                                                  |                  |                                                 |                |                                             |                  |
|                                  | AALC                                          | 1.38 (1.00-1.92)                                 | <b>0.048</b>     | 1.40 (1.08-1.83)                                | <b>0.009</b>   | 1.70 (1.03-2.82)                            | <b>0.038</b>     |
|                                  | NAHC                                          | 1.53 (1.10-2.12)                                 | <b>0.011</b>     | 1.16 (0.88-1.52)                                | 0.286          | 1.59 (0.95-2.66)                            | 0.077            |
|                                  | AAHC                                          | 2.02 (1.47-2.77)                                 | <b>&lt;0.001</b> | 1.41 (1.08-1.84)                                | <b>0.010</b>   | 3.04 (1.86-4.98)                            | <b>&lt;0.001</b> |
| <b>Infant sex</b>                |                                               |                                                  |                  |                                                 |                |                                             |                  |
|                                  | AALC                                          | 1.37 (0.99-1.89)                                 | 0.055            | 1.47 (1.14-1.91)                                | <b>0.003</b>   | 1.77 (1.07-2.93)                            | <b>0.025</b>     |
|                                  | NAHC                                          | 1.52 (1.10-2.12)                                 | <b>0.011</b>     | 1.17 (0.89-1.54)                                | 0.249          | 1.59 (0.95-2.67)                            | 0.074            |
|                                  | AAHC                                          | 2.01 (1.47-2.75)                                 | <b>&lt;0.001</b> | 1.47 (1.13-1.92)                                | <b>0.004</b>   | 3.24 (1.98-5.24)                            | <b>&lt;0.001</b> |
| <b>Breastfeeding at 3 Months</b> |                                               |                                                  |                  |                                                 |                |                                             |                  |
|                                  | AALC                                          | 1.34 (0.96-1.87)                                 | 0.076            | 1.46 (1.12-1.89)                                | <b>0.004</b>   | 1.59 (0.95-2.65)                            | <b>0.076</b>     |
|                                  | NAHC                                          | 1.29 (0.92-1.80)                                 | 0.138            | 1.17 (0.88-1.54)                                | 0.265          | 1.36 (0.80-2.31)                            | 0.252            |
|                                  | AAHC                                          | 1.76 (1.28-2.43)                                 | <b>&lt;0.001</b> | 1.45 (1.11-1.89)                                | <b>0.005</b>   | 2.79 (1.69-4.61)                            | <b>&lt;0.001</b> |
| <b>Furry pet</b>                 |                                               |                                                  |                  |                                                 |                |                                             |                  |
|                                  | AALC                                          | 1.36 (0.98-1.88)                                 | 0.061            | 1.47 (1.13-1.90)                                | <b>0.004</b>   | 1.73 (1.04-2.86)                            | <b>0.032</b>     |

|                       |      |                  |                  |                  |              |                  |                  |
|-----------------------|------|------------------|------------------|------------------|--------------|------------------|------------------|
|                       | NAHC | 1.45 (1.04-2.02) | <b>0.026</b>     | 1.19 (0.90-1.58) | 0.197        | 1.53 (0.91-2.58) | 0.104            |
|                       | AAHC | 1.90 (1.39-2.61) | <b>&lt;0.001</b> | 1.49 (1.14-1.95) | <b>0.003</b> | 3.05 (1.86-5.01) | <b>&lt;0.001</b> |
| <b>Older sibling</b>  |      |                  |                  |                  |              |                  |                  |
|                       | AALC | 1.34 (0.97-1.86) | 0.073            | 1.38 (1.06-1.79) | <b>0.015</b> | 1.52 (0.91-2.55) | 0.104            |
|                       | NAHC | 1.54 (1.11-2.15) | <b>0.009</b>     | 1.18 (0.90-1.56) | 0.224        | 1.72 (1.01-2.91) | 0.043            |
|                       | AAHC | 1.95 (1.43-2.67) | <b>&lt;0.001</b> | 1.38 (1.06-1.80) | <b>0.016</b> | 3.01 (1.82-4.96) | <b>&lt;0.001</b> |
| <b>Smoke exposure</b> |      |                  |                  |                  |              |                  |                  |
|                       | AALC | 1.37 (0.99-1.90) | 0.055            | 1.44 (1.11-1.87) | <b>0.006</b> | 1.73 (1.04-2.88) | <b>0.033</b>     |
|                       | NAHC | 1.44 (1.03-2.01) | <b>0.029</b>     | 1.15 (0.87-1.52) | 0.295        | 1.45 (0.85-2.46) | 0.165            |
|                       | AAHC | 1.90 (1.38-2.61) | <b>&lt;0.001</b> | 1.46 (1.12-1.90) | <b>0.005</b> | 3.15 (1.92-2.45) | <b>&lt;0.001</b> |

Notes: \*Antimicrobial exposure by 3 months (NALC: no antibiotics and lower usage of cleaning products, AALC: any antibiotics and lower usage of cleaning products, NAHC: no antibiotics and higher usage of cleaning products, AAHC: any antibiotics and higher usage of cleaning products); OR: odds ratio; CI: confidence interval; *p*-value calculated using logistic regression and displayed in **bold** when statistically significant.

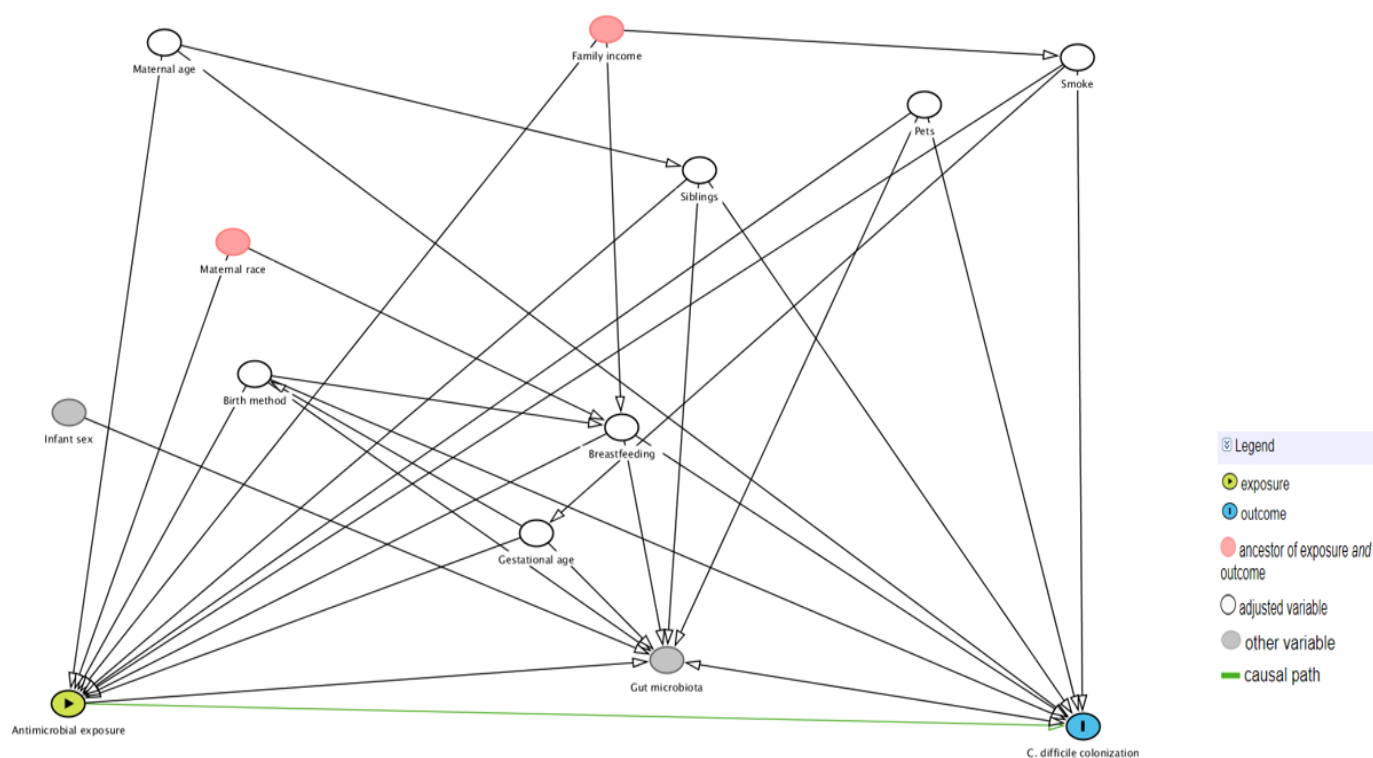

**Figure S1.** Directed Acyclic Graph (DAG) for antimicrobial exposure and *C. difficile* colonization at 3–4 Months (minimal sufficient adjustment sets for estimating the total effect of exposure on outcome: Maternal age, Birth method, Gestational age, Breastfeeding, Older sibling, Furry pet, Smoke exposure).

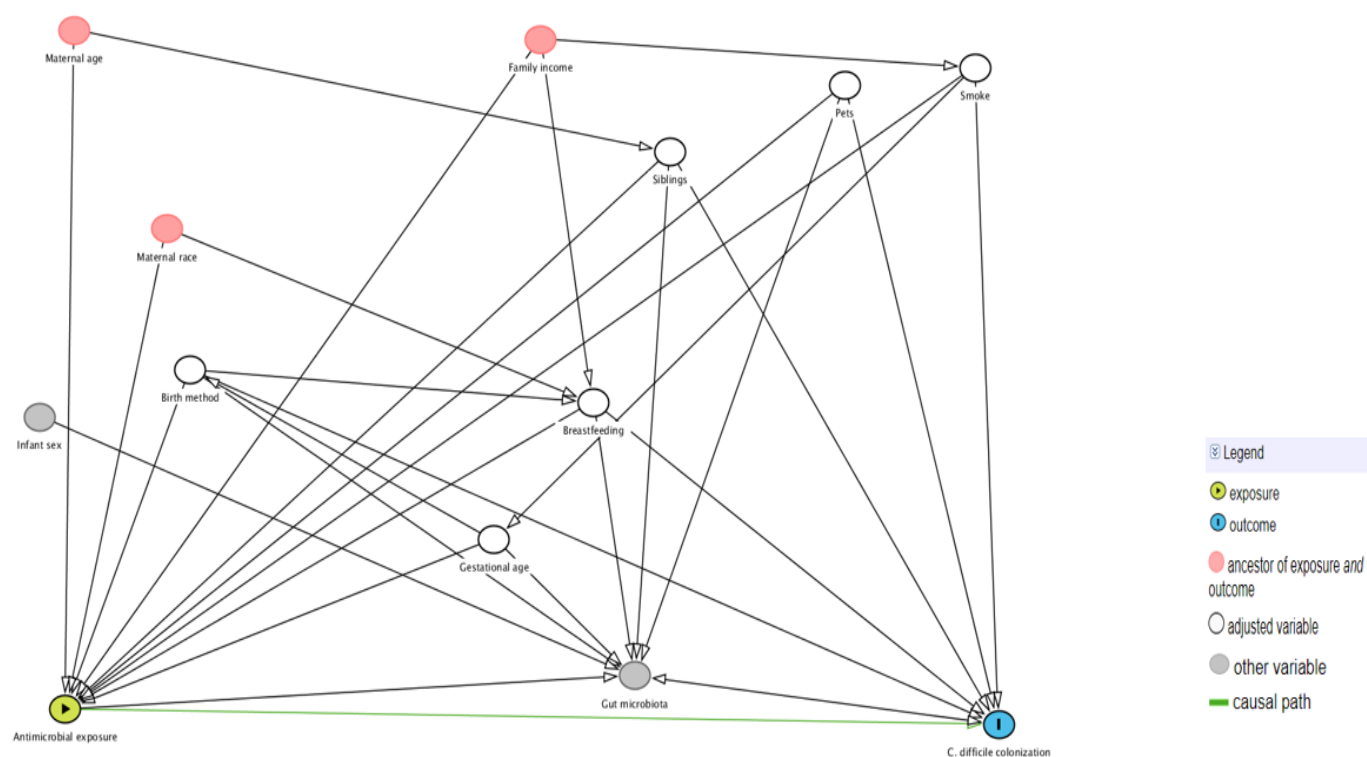

**Figure S2.** Directed Acyclic Graph (DAG) for antimicrobial exposure and *C. difficile* colonization at 12 Months (minimal sufficient adjustment sets for estimating the total effect of exposure on outcome: Birth method, Gestational age, Breastfeeding, Older sibling, Furry pet, Smoke exposure).

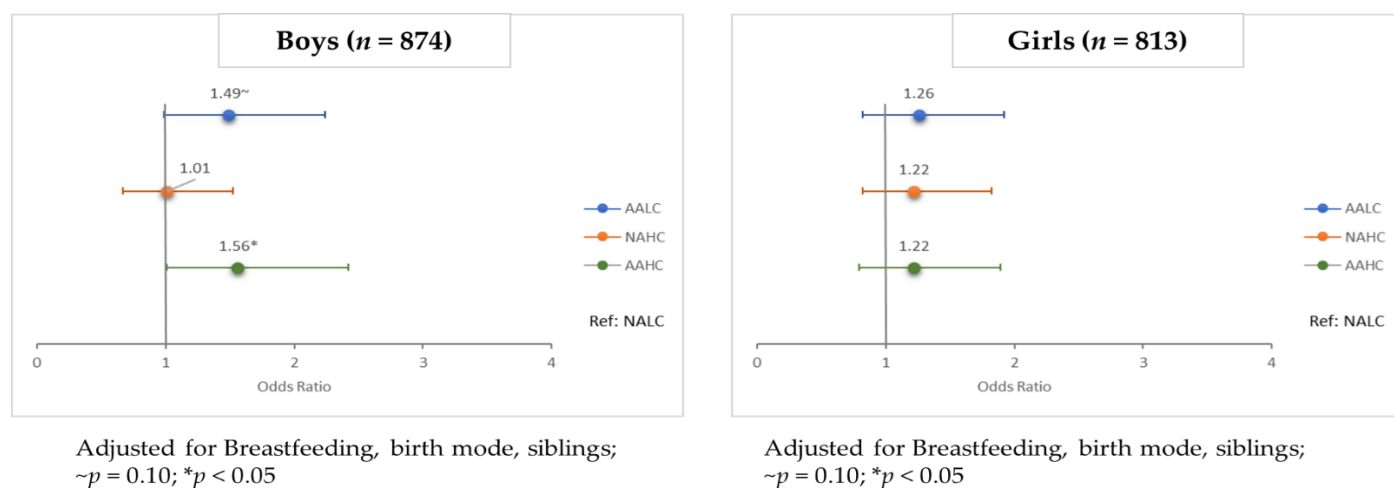

**Figure S3.** Stratified analysis by infant sex for antimicrobial exposure and *C. difficile* colonization at 12 months.

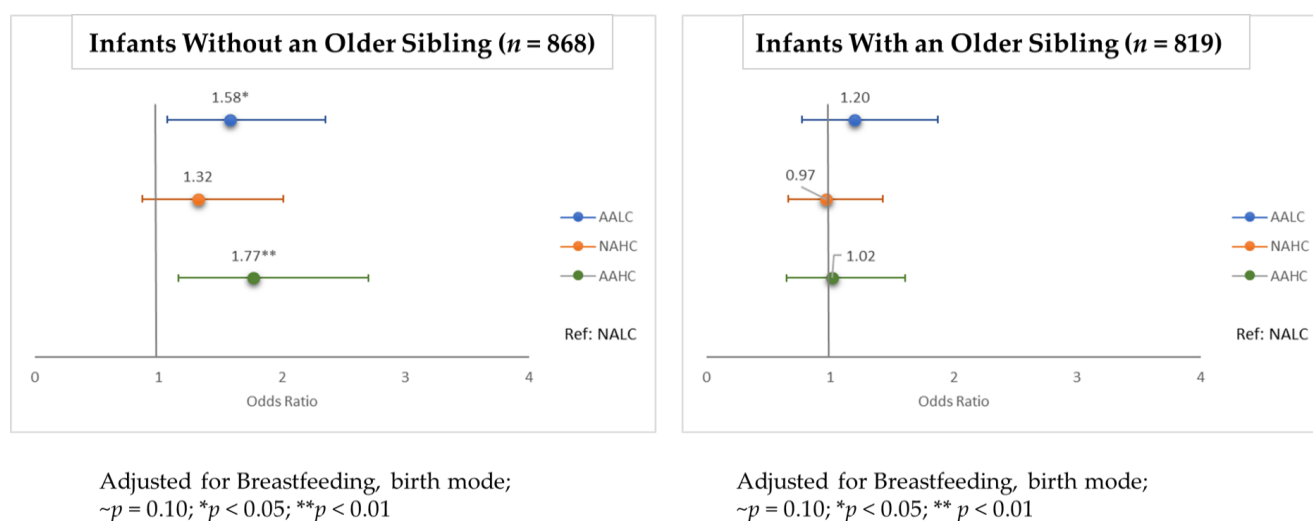

**Figure S4.** Stratified analysis by older siblingship for antimicrobial exposure and *C. difficile* colonization at 12 months.

50. Which of the following products have been USED in your home since your baby was born?  
(Day=daily, Wk=weekly, Mth=monthly, <Mth=less than monthly, No=not used)

| Product                                          | Day                   | Wk                    | Mth                   | <Mth                  | No                    |
|--------------------------------------------------|-----------------------|-----------------------|-----------------------|-----------------------|-----------------------|
| 50.1 Liquid or solid air freshener:              | <input type="radio"/> |
| 50.2 Spray air freshener:                        | <input type="radio"/> |
| 50.3 Plug-in deodorizer/air freshener:           | <input type="radio"/> |
| 50.4 Floor Cleaner:                              | <input type="radio"/> |
| 50.5 Furniture polish:                           | <input type="radio"/> |
| 50.6 Floor polish:                               | <input type="radio"/> |
| 50.7 Dusting polish or spray:                    | <input type="radio"/> |
| 50.8 Drain cleaner:                              | <input type="radio"/> |
| 50.9 Hand dishwashing detergent:                 | <input type="radio"/> |
| 50.10 Dishwasher detergent:                      | <input type="radio"/> |
| 50.11 Bleach:                                    | <input type="radio"/> |
| 50.12 Multi-surface cleaner:                     | <input type="radio"/> |
| 50.13 Silver or brass polish:                    | <input type="radio"/> |
| 50.14 Disinfectant in bedrooms:                  | <input type="radio"/> |
| 50.15 Disinfectant in home in general:           | <input type="radio"/> |
| 50.19 Eco & organic cleaning product:            | <input type="radio"/> |
| 50.20 Glass cleaner:                             | <input type="radio"/> |
| 50.21 Chemical hand cleaner (e.g., for grease):  | <input type="radio"/> |
| 50.22 Purell-type hand cleaner:                  | <input type="radio"/> |
| 50.23 Unscented laundry detergent:               | <input type="radio"/> |
| 50.24 Scented laundry detergent:                 | <input type="radio"/> |
| 50.25 Fabric softener:                           | <input type="radio"/> |
| 50.26 Toilet bowl cleaner:                       | <input type="radio"/> |
| 50.27 Oven cleaner:                              | <input type="radio"/> |
| 50.28 Bathroom tile cleaner:                     | <input type="radio"/> |
| 50.29 Solvents (e.g. nail polish/paint remover): | <input type="radio"/> |

**Figure S5.** Questionnaire on household cleaning products use (Frequency of use score: 0 for never (not used), 1 for less than a month, 2 for monthly, 3 for weekly and 4 for daily).
